# Supplementary material for: Role of the Purkinje-Muscle Junction on the Ventricular Repolarization Heterogeneity in the Healthy and Ischemic Ovine Ventricular Myocardium
Source: PubMed Central journal article supplement (PMC6010581; doi:10.3389/fphys.2018.00718), 2018-06-14
Supplement: Presentation_1.pdf [file Presentation_1.pdf]

## *Supplementary Material*

# **Role of the Purkinje-muscle junction on the ventricular action potential duration heterogeneity in the healthy and ischemic ventricular myocardium**

**Marine E. Martinez\***, Richard D. Walton, Jason D. Bayer, Michel Haïssaguerre, Edward J. Vigmond, Mélèze Hocini and Olivier Bernus

**\* Correspondence:**

Corresponding Author: Marine Martinez

L'Institut de Rythmologie et Modélisation Cardiaque (LIRYC)

CRCTB U1045

Hopital Xavier Arnoz,

Avenue du Haut Lévêque,

33604 Pessac,

France.

Tel: +33 (0) 5 35 38 19 54

Fax: +33 (0) 5 35 38 19 98

[marine.martinez@ihu-liryc.fr](mailto:marine.martinez@ihu-liryc.fr)

## Supplementary Figures

## Supplementary Figure 1

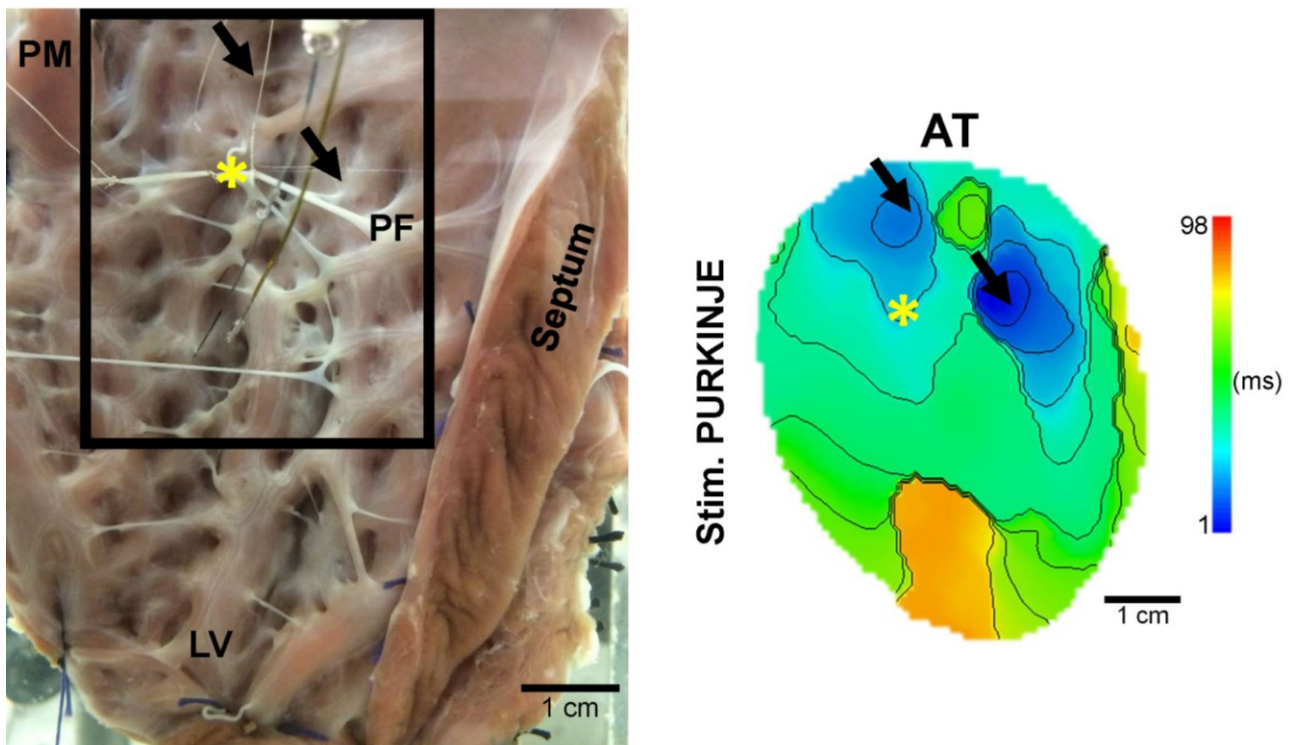

**Supplementary Figure 1. Localization of PMJs by free-running PF pacing.** Endocardial view of an experimental preparation and corresponding AT map during PF pacing at 1 Hz. Yellow star indicates bipolar free-running PF stimulation and black arrows show activation origins corresponding to PMJs.

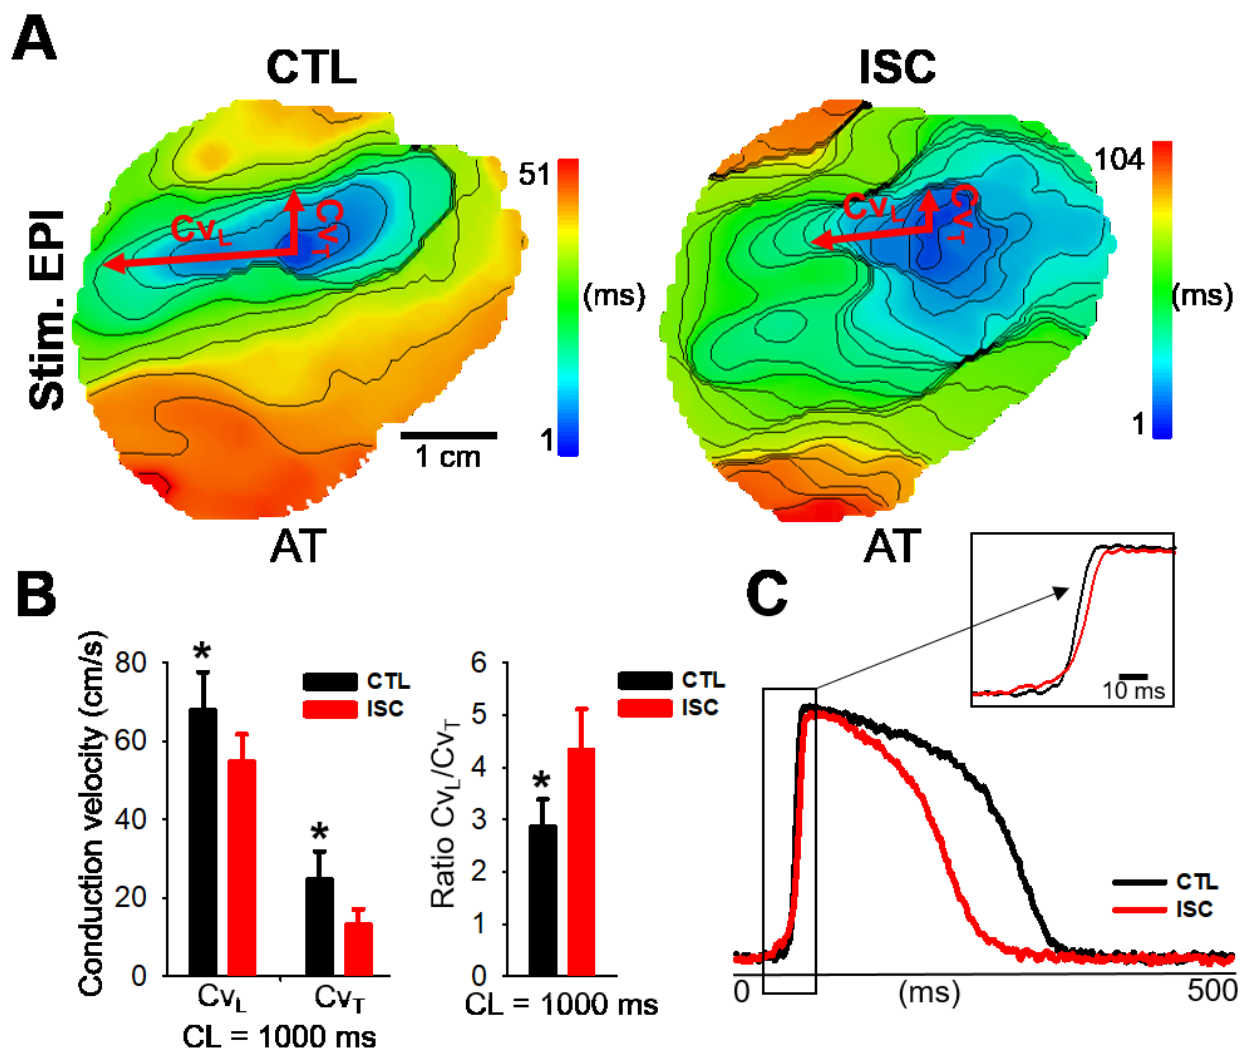

**Supplementary Figure 2. Conduction velocity before and after the onset of no-flow ischemia. A,** Epicardial AT maps during EPI stimulation at 1 Hz, before and after 7 min of no-flow ischemia. Isochrones are 5 ms spacing. CTL=control, ISC=ischemia. **B,** Longitudinal (Cv<sub>L</sub>) and transversal (Cv<sub>T</sub>) conduction velocity and their ratio from EPI surface when pacing EPI at 1 Hz, in control versus ischemic conditions. **C,** AP traces and corresponding upstrokes extracted from the origin of activation when pacing EPI at 1 Hz, during CTL or ISC. Statistical differences were determined by paired t-tests (\*p<0.05).
